# Supplementary material for: Marking the Profile of the Microflora of the Endometrium and Uterine Cervix in Women as a Potential Factor Determining the Effectiveness of In Vitro Fertilization
Source: MDPI journal article supplement (doi:10.3390/jcm11123348), 2022-06-10
Supplement: s1 [file s1]

**Table S1.** Results of post-hoc Tukey's test ( $p < 0.05$ ) presenting statistically significant differences in the number of readings of individual bacterial strains colonizing the endometrium and uterine cervix of patients qualified for the IVF procedure.

| Num<br>ber | Name of taxon                          | {1}          | {2}          | {3}          | {4}          | {5}          | {6}          | {7}          | {8}          | {9}          | {10}         | {11}         | {12}         | {13}         | {14}         | {15}         | {16}         | {17}         | {18}         | {19}         | {20}         | {21}         | {22}         |
|------------|----------------------------------------|--------------|--------------|--------------|--------------|--------------|--------------|--------------|--------------|--------------|--------------|--------------|--------------|--------------|--------------|--------------|--------------|--------------|--------------|--------------|--------------|--------------|--------------|
| 1          | <i>Aerococcus christensenii</i>        |              | 1.000<br>000 | 1.000<br>000 | 0.999<br>999 | 1.000<br>000 | 1.000<br>000 | 1.000<br>000 | 0.965<br>496 | 1.000<br>000 | 1.000<br>000 | 1.000<br>000 | 1.000<br>000 | 0.786<br>143 | 0.018<br>682 | 0.866<br>165 | 0.555<br>109 | 1.000<br>000 | 1.000<br>000 | 1.000<br>000 | 1.000<br>000 | 1.000<br>000 | 1.000<br>000 |
| 2          | <i>Alloscardovia omnicolens</i>        | 1.000<br>000 |              | 1.000<br>000 | 1.000<br>000 | 1.000<br>000 | 1.000<br>000 | 1.000<br>000 | 0.989<br>252 | 1.000<br>000 | 1.000<br>000 | 1.000<br>000 | 1.000<br>000 | 0.937<br>381 | 0.137<br>542 | 0.960<br>656 | 0.823<br>817 | 1.000<br>000 | 1.000<br>000 | 1.000<br>000 | 1.000<br>000 | 1.000<br>000 | 1.000<br>000 |
| 3          | <i>Atopobium parvulum</i>              | 1.000<br>000 | 1.000<br>000 |              | 1.000<br>000 | 1.000<br>000 | 1.000<br>000 | 1.000<br>000 | 1.000<br>000 | 1.000<br>000 | 1.000<br>999 | 0.999<br>998 | 0.999<br>976 | 0.507<br>407 | 0.999<br>993 | 0.998<br>868 | 1.000<br>000 | 0.999<br>995 | 1.000<br>000 | 1.000<br>000 | 1.000<br>000 | 1.000<br>000 | 1.000<br>000 |
| 4          | <i>Bifidobacterium breve</i>           | 0.999<br>999 | 1.000<br>000 | 1.000<br>000 |              | 1.000<br>000 | 1.000<br>000 | 1.000<br>000 | 0.999<br>635 | 1.000<br>000 | 1.000<br>997 | 0.999<br>994 | 0.925<br>862 | 0.000<br>569 | 0.983<br>121 | 0.632<br>185 | 1.000<br>000 | 0.999<br>858 | 1.000<br>000 | 1.000<br>000 | 1.000<br>000 | 1.000<br>000 | 1.000<br>000 |
| 5          | <i>Bifidobacterium longum</i> group    | 1.000<br>000 | 1.000<br>000 | 1.000<br>000 | 1.000<br>000 |              | 1.000<br>000 | 1.000<br>000 | 0.999<br>987 | 1.000<br>000 | 1.000<br>000 | 1.000<br>000 | 1.000<br>000 | 0.999<br>719 | 0.584<br>255 | 0.999<br>877 | 0.996<br>230 | 1.000<br>000 | 1.000<br>000 | 1.000<br>000 | 1.000<br>000 | 1.000<br>000 | 1.000<br>000 |
| 6          | <i>Clostridium fallax</i>              | 1.000<br>000 | 1.000<br>000 | 1.000<br>000 | 1.000<br>000 | 1.000<br>000 |              | 1.000<br>000 | 0.989<br>717 | 1.000<br>000 | 1.000<br>000 | 1.000<br>000 | 1.000<br>000 | 0.939<br>425 | 0.140<br>186 | 0.962<br>058 | 0.827<br>793 | 1.000<br>000 | 1.000<br>000 | 1.000<br>000 | 1.000<br>000 | 1.000<br>000 | 1.000<br>000 |
| 7          | <i>Enterococcus faecalis</i>           | 1.000<br>000 | 1.000<br>000 | 1.000<br>000 | 1.000<br>000 | 1.000<br>000 |              |              | 0.990<br>855 | 1.000<br>000 | 1.000<br>000 | 1.000<br>000 | 1.000<br>000 | 0.910<br>382 | 0.044<br>475 | 0.950<br>959 | 0.738<br>653 | 1.000<br>000 | 1.000<br>000 | 1.000<br>000 | 1.000<br>000 | 1.000<br>000 | 1.000<br>000 |
| 8          | <i>Escherichia coli</i> group          | 0.965<br>496 | 0.989<br>252 | 1.000<br>000 | 0.999<br>635 | 0.999<br>987 | 0.989<br>717 | 0.990<br>855 |              | 0.987<br>966 | 0.999<br>989 | 0.956<br>218 | 0.948<br>223 | 1.000<br>000 | 0.792<br>460 | 1.000<br>000 | 1.000<br>000 | 0.999<br>994 | 0.701<br>115 | 0.988<br>563 | 0.997<br>946 | 0.999<br>978 | 0.999<br>881 |
| 9          | <i>Gardnerella vaginalis</i> group     | 1.000<br>000 | 1.000<br>000 | 1.000<br>000 | 1.000<br>000 | 1.000<br>000 | 1.000<br>000 | 0.987<br>966 |              |              | 1.000<br>000 | 1.000<br>000 | 1.000<br>000 | 0.647<br>717 | 0.000<br>131 | 0.848<br>839 | 0.292<br>742 | 1.000<br>000 | 1.000<br>000 | 1.000<br>000 | 1.000<br>000 | 1.000<br>000 | 1.000<br>000 |
| 10         | <i>Lactobacillus delbrueckii</i> group | 1.000<br>000 | 1.000<br>000 | 1.000<br>000 | 1.000<br>000 | 1.000<br>000 | 1.000<br>000 | 0.999<br>000 | 1.000<br>989 |              |              | 1.000<br>000 | 1.000<br>000 | 0.999<br>441 | 0.322<br>463 | 0.999<br>810 | 0.990<br>719 | 1.000<br>000 | 1.000<br>000 | 1.000<br>000 | 1.000<br>000 | 1.000<br>000 | 1.000<br>000 |
| 11         | <i>Lactobacillus fermentum</i>         | 1.000<br>000 | 1.000<br>000 | 0.999<br>999 | 0.999<br>997 | 1.000<br>000 | 1.000<br>000 | 1.000<br>000 | 0.956<br>218 | 1.000<br>000 | 1.000<br>000 |              | 1.000<br>000 | 0.752<br>211 | 0.015<br>366 | 0.840<br>763 | 0.514<br>586 | 1.000<br>000 | 1.000<br>000 | 1.000<br>000 | 1.000<br>000 | 1.000<br>000 | 1.000<br>000 |
| 12         | <i>Lactobacillus</i> FN667084_s        | 1.000<br>000 | 1.000<br>000 | 0.999<br>998 | 0.999<br>994 | 1.000<br>000 | 1.000<br>000 | 1.000<br>000 | 0.948<br>223 | 1.000<br>000 | 1.000<br>000 | 1.000<br>000 |              | 0.725<br>658 | 0.013<br>261 | 0.820<br>283 | 0.484<br>761 | 1.000<br>000 | 1.000<br>000 | 1.000<br>000 | 1.000<br>000 | 1.000<br>000 | 1.000<br>000 |
| 13         | <i>Lactobacillus gasseri</i> group     | 0.786<br>143 | 0.937<br>381 | 0.999<br>976 | 0.925<br>862 | 0.999<br>719 | 0.939<br>425 | 0.910<br>382 | 1.000<br>000 | 0.647<br>717 | 0.999<br>441 | 0.752<br>211 | 0.725<br>658 |              | 0.004<br>716 | 1.000<br>000 | 1.000<br>000 | 0.999<br>626 | 0.059<br>366 | 0.934<br>395 | 0.903<br>806 | 0.999<br>030 | 0.996<br>303 |

|           |                                       |       |       |       |       |       |       |       |       |       |       |       |       |       |       |       |       |       |       |       |       |       |       |
|-----------|---------------------------------------|-------|-------|-------|-------|-------|-------|-------|-------|-------|-------|-------|-------|-------|-------|-------|-------|-------|-------|-------|-------|-------|-------|
| <b>14</b> | <i>Lactobacillus helveticus</i> group | 0.018 | 0.137 | 0.507 | 0.000 | 0.584 | 0.140 | 0.044 | 0.792 | 0.000 | 0.322 | 0.015 | 0.013 | 0.004 |       | 0.187 | 0.109 | 0.347 | 0.000 | 0.133 | 0.003 | 0.288 | 0.205 |
|           |                                       | 682   | 542   | 407   | 569   | 255   | 186   | 475   | 460   | 131   | 463   | 366   | 261   | 716   |       | 162   | 022   | 547   | 015   | 854   | 550   | 012   | 300   |
| <b>15</b> | <i>Lactobacillus iners</i>            | 0.866 | 0.960 | 0.999 | 0.983 | 0.999 | 0.962 | 0.950 | 1.000 | 0.848 | 0.999 | 0.840 | 0.820 | 1.000 | 0.187 |       | 1.000 | 0.999 | 0.207 | 0.958 | 0.965 | 0.999 | 0.998 |
|           |                                       | 165   | 656   | 993   | 121   | 877   | 058   | 959   | 000   | 839   | 810   | 763   | 283   | 000   | 162   |       | 000   | 877   | 832   | 599   | 910   | 658   | 551   |
| <b>16</b> | <i>Lactobacillus jensenii</i> group   | 0.555 | 0.823 | 0.998 | 0.632 | 0.996 | 0.827 | 0.738 | 1.000 | 0.292 | 0.990 | 0.514 | 0.484 | 1.000 | 0.109 | 1.000 |       | 0.992 | 0.010 | 0.818 | 0.644 | 0.986 | 0.967 |
|           |                                       | 109   | 817   | 868   | 185   | 230   | 793   | 653   | 000   | 742   | 719   | 586   | 761   | 000   | 022   | 000   |       | 921   | 148   | 088   | 217   | 566   | 138   |
| <b>17</b> | <i>Lactobacillus paracasei</i> group  | 1.000 | 1.000 | 1.000 | 1.000 | 1.000 | 1.000 | 1.000 | 0.999 | 1.000 | 1.000 | 1.000 | 1.000 | 0.999 | 0.347 | 0.999 | 0.992 |       | 1.000 | 1.000 | 1.000 | 1.000 | 1.000 |
|           |                                       | 000   | 000   | 000   | 000   | 000   | 000   | 000   | 994   | 000   | 000   | 000   | 000   | 626   | 547   | 877   | 921   |       | 000   | 000   | 000   | 000   | 000   |
| <b>18</b> | <i>Lactobacillus reuteri</i> group    | 1.000 | 1.000 | 0.999 | 0.999 | 1.000 | 1.000 | 1.000 | 0.701 | 1.000 | 1.000 | 1.000 | 1.000 | 0.059 | 0.000 | 0.207 | 0.010 | 1.000 |       | 1.000 | 1.000 | 1.000 | 1.000 |
|           |                                       | 000   | 000   | 995   | 858   | 000   | 000   | 000   | 115   | 000   | 000   | 000   | 000   | 366   | 015   | 832   | 148   | 000   |       | 000   | 000   | 000   | 000   |
| <b>19</b> | <i>Lactobacillus_uc</i>               | 1.000 | 1.000 | 1.000 | 1.000 | 1.000 | 1.000 | 1.000 | 0.988 | 1.000 | 1.000 | 1.000 | 1.000 | 0.934 | 0.133 | 0.958 | 0.818 | 1.000 | 1.000 |       | 1.000 | 1.000 | 1.000 |
|           |                                       | 000   | 000   | 000   | 000   | 000   | 000   | 000   | 563   | 000   | 000   | 000   | 000   | 395   | 854   | 599   | 088   | 000   | 000   |       | 000   | 000   | 000   |
| <b>20</b> | <i>Staphylococcus aureus</i> group    | 1.000 | 1.000 | 1.000 | 1.000 | 1.000 | 1.000 | 1.000 | 0.997 | 1.000 | 1.000 | 1.000 | 1.000 | 0.903 | 0.003 | 0.965 | 0.644 | 1.000 | 1.000 | 1.000 |       | 1.000 | 1.000 |
|           |                                       | 000   | 000   | 000   | 000   | 000   | 000   | 000   | 946   | 000   | 000   | 000   | 000   | 806   | 550   | 910   | 217   | 000   | 000   | 000   |       | 000   | 000   |
| <b>21</b> | <i>Streptococcus agalactiae</i>       | 1.000 | 1.000 | 1.000 | 1.000 | 1.000 | 1.000 | 1.000 | 0.999 | 1.000 | 1.000 | 1.000 | 1.000 | 0.999 | 0.288 | 0.999 | 0.986 | 1.000 | 1.000 | 1.000 | 1.000 |       | 1.000 |
|           |                                       | 000   | 000   | 000   | 000   | 000   | 000   | 000   | 978   | 000   | 000   | 000   | 000   | 030   | 012   | 658   | 566   | 000   | 000   | 000   | 000   |       | 000   |
| <b>22</b> | <i>Streptococcus salivarius</i> group | 1.000 | 1.000 | 1.000 | 1.000 | 1.000 | 1.000 | 1.000 | 0.999 | 1.000 | 1.000 | 1.000 | 1.000 | 0.996 | 0.205 | 0.998 | 0.967 | 1.000 | 1.000 | 1.000 | 1.000 | 1.000 |       |
|           |                                       | 000   | 000   | 000   | 000   | 000   | 000   | 000   | 881   | 000   | 000   | 000   | 000   | 303   | 300   | 551   | 138   | 000   | 000   | 000   | 000   | 000   |       |
